# Supplementary material for: Comparative Analysis of Frailty Risk and Associated Factors: Community-Based vs. Open Recruitment Groups
Source: MDPI journal article supplement (doi:10.3390/ijerph21050611), 2024-05-10
Supplement: s1 [file s1]

**Supplementary Table S1. Questions of Eleven Check.**

---

**Eating habits**

---

Do you try to eat healthier than persons of the same gender and age?

Do you eat both a vegetable dish and a main dish (meat or fish) at least twice daily?

---

**Oral functions**

---

Can you chew through even hard foods, such as "dried squid" and "pickled radish" normally?

Do you choke on tea or soup?

---

**Motor functions**

---

Do you exercise to the point of sweating for at least 30 minutes a day at least twice a week and more than a year?

Do you walk or engage in similar physical activity in your daily life for at least one hour a day?

Do you think you can walk faster than persons of the same gender and age?

---

**Social and mental functions**

---

Do you go out less often than you did last year?

Do you eat with others at least once a day?

Do you consider yourself to be vibrant?

Are you worried about forgetfulness more than anything else?

---
